# Supplementary material
Source: PubMed Central journal article supplement (PMC6279471)
Supplement: NIHMS1506278-supplement-1.pdf [file NIHMS1506278-supplement-1.pdf]

**Supplemental Table 1. Unadjusted Inflammatory Profiles at Rest and 90-Minutes after Mental Stress by PTSD Status. Values Reported are Geometric Mean Concentrations of IL-6, HsCRP, MCP-1, MMP-9, ICAM-1 and VCAM-1.**

|                       | PTSD (-) |                         | PTSD (+) |                         | p-value      |
|-----------------------|----------|-------------------------|----------|-------------------------|--------------|
|                       | N        | Geometric Mean (95% CI) | N        | Geometric Mean (95% CI) |              |
| <b>IL-6, pg/mL</b>    |          |                         |          |                         |              |
| Rest                  | 239      | 1.6 (1.8, 1.5)          | 32       | 1.6 (1.3, 2.0)          | 0.67         |
| 90-Minutes            | 207      | 2.7 (2.5, 2.9)          | 25       | 3.8 (3.1, 4.8)          | <b>0.017</b> |
| PTSD*Time Interaction |          |                         |          |                         | <b>0.002</b> |
| <b>HsCRP, mg/L</b>    |          |                         |          |                         |              |
| Rest                  | 239      | 2.6 (2.2, 3.2)          | 32       | 2.8 (1.7, 4.5)          | 0.55         |
| 90-Minutes            | 207      | 2.6 (2.1, 3.1)          | 25       | 1.5 (1.6, 4.5)          | 0.54         |
| PTSD*Time Interaction |          |                         |          |                         | 0.93         |
| <b>MCP-1, pg/mL</b>   |          |                         |          |                         |              |
| Rest                  | 239      | 123 (118, 128)          | 32       | 133 (123, 152)          | 0.063        |
| 90-Minutes            | 207      | 130 (125, 136)          | 25       | 146 (135, 168)          | <b>0.018</b> |
| PTSD*Time Interaction |          |                         |          |                         | 0.35         |
| <b>MMP-9, pg/mL</b>   |          |                         |          |                         |              |
| Rest                  | 239      | 60.8 (55.8, 66.2)       | 32       | 51.8 (41.3, 65.0)       | 0.14         |
| 90-Minutes            | 207      | 67.2 (61.5, 73.3)       | 25       | 54.3 (42.8, 68.8)       | 0.06         |
| PTSD*Time Interaction |          |                         |          |                         | 0.50         |
| <b>ICAM-1, ng/mL</b>  |          |                         |          |                         |              |
| Rest                  | 239      | 128 (121, 136)          | 32       | 142 (122, 166)          | <b>0.046</b> |
| 90-Minutes            | 207      | 125 (119, 134)          | 25       | 138 (118, 163)          | 0.053        |
| PTSD*Time Interaction |          |                         |          |                         | 0.99         |
| <b>VCAM-1, ng/mL</b>  |          |                         |          |                         |              |
| Rest                  | 239      | 51.6 (48.8, 54.7)       | 32       | 56.5 (48.6, 65.6)       | 0.13         |
| 90-Minutes            | 207      | 50.9 (48.0, 53.9)       | 25       | 54.9 (47.0, 64.2)       | 0.12         |
| PTSD*Time Interaction |          |                         |          |                         | 0.87         |

Abbreviations: IL-6; interleukin-6; HsCRP: high-sensitivity C reactive protein; MCP-1: monocyte chemoattractant protein-1; MMP-9: matrix metalloproteinase 9; ICAM-1: soluble intercellular adhesion molecule-1; VCAM-1: soluble vascular cell adhesion molecule-1.
